# Supplementary material
Source: MDPI journal article supplement (https://www.mdpi.com/search?q=molbank-2023-M1547)
Supplement: s002 [file molbank-2023-M1547-s002-mod.mol]

KingDraw KingDraw.mol
  corina  01122307253D 1   1.00000     0.00000 
CORINA 4.4.0 0026  12.08.2021
 32 36  0  0  0  0  0  0  0  0999 V2000
    9.3673    1.8775    0.2055 C   0  0  0  0  0  0  0  0  0  0  0  0
    9.3489    2.9576   -0.6187 C   0  0  0  0  0  0  0  0  0  0  0  0
    8.0615    3.3260   -0.8253 N   0  0  0  0  0  0  0  0  0  0  0  0
    7.2416    2.4712   -0.1224 C   0  0  0  0  0  0  0  0  0  0  0  0
    8.0498    1.5619    0.5330 C   0  0  0  0  0  0  0  0  0  0  0  0
    5.7783    2.5209   -0.0734 C   0  0  0  0  0  0  0  0  0  0  0  0
    4.9424    1.4442   -0.0956 N   0  0  0  0  0  0  0  0  0  0  0  0
    3.6300    1.8898   -0.0326 C   0  0  0  0  0  0  0  0  0  0  0  0
    3.6451    3.2789    0.0243 C   0  0  0  0  0  0  0  0  0  0  0  0
    5.0000    3.6824    0.0049 C   0  0  0  0  0  0  0  0  0  0  0  0
    2.5392    4.1120    0.0908 N   0  0  0  0  0  0  0  0  0  0  0  0
    2.4790    1.0747   -0.0326 C   0  0  0  0  0  0  0  0  0  0  0  0
    1.8918    0.8491   -1.0769 O   0  0  0  0  0  0  0  0  0  0  0  0
    5.3622    0.0428   -0.1737 C   0  0  0  0  0  0  0  0  0  0  0  0
   10.5901    3.6059   -1.1842 C   0  0  0  0  0  0  0  0  0  0  0  0
   11.7984    3.1334   -0.3673 C   0  0  0  0  0  0  0  0  0  0  0  0
   11.7756    1.6066   -0.2561 C   0  0  0  0  0  0  0  0  0  0  0  0
   10.6238    1.1786    0.6616 C   0  0  0  0  0  0  0  0  0  0  0  0
    5.4859    5.0287    0.0507 C   0  0  0  0  0  0  0  0  0  0  0  0
    5.8713    6.0967    0.0870 N   0  0  0  0  0  0  0  0  0  0  0  0
    1.9842    0.4933    1.2349 C   0  0  0  0  0  0  0  0  0  0  0  0
    0.7899   -0.2285    1.2558 C   0  0  0  0  0  0  0  0  0  0  0  0
    0.3310   -0.7627    2.4420 C   0  0  0  0  0  0  0  0  0  0  0  0
    1.0576   -0.5935    3.6073 C   0  0  0  0  0  0  0  0  0  0  0  0
    2.2426    0.1206    3.5934 C   0  0  0  0  0  0  0  0  0  0  0  0
    2.7096    0.6648    2.4149 C   0  0  0  0  0  0  0  0  0  0  0  0
    5.4597   -0.3726   -1.6190 C   0  0  0  0  0  0  0  0  0  0  0  0
    6.6507   -0.2185   -2.3036 C   0  0  0  0  0  0  0  0  0  0  0  0
    6.7403   -0.5998   -3.6293 C   0  0  0  0  0  0  0  0  0  0  0  0
    5.6389   -1.1353   -4.2704 C   0  0  0  0  0  0  0  0  0  0  0  0
    4.4478   -1.2893   -3.5858 C   0  0  0  0  0  0  0  0  0  0  0  0
    4.3598   -0.9128   -2.2587 C   0  0  0  0  0  0  0  0  0  0  0  0
  1  2  2  0
  2  3  1  0
  3  4  1  0
  4  5  2  0
  5  1  1  0
  4  6  1  0
  6  7  1  0
  7  8  1  0
  8  9  2  0
  9 10  1  0
 10  6  2  0
 10 19  1  0
  9 11  1  0
  8 12  1  0
 12 13  2  0
 12 21  1  0
  7 14  1  0
 14 27  1  0
 15  2  1  0
 16 15  1  0
 17 16  1  0
 18 17  1  0
  1 18  1  0
 19 20  3  0
 25 26  2  0
 24 25  1  0
 23 24  2  0
 22 23  1  0
 21 22  2  0
 21 26  1  0
 27 28  2  0
 28 29  1  0
 29 30  2  0
 30 31  1  0
 31 32  2  0
 27 32  1  0
M  STY  1   1 SUP
M  SLB  1   1   1
M  SAL   1  2  19  20
M  SBL   1  1  12
M  SMT   1 ^CN
M  STY  1   2 SUP
M  SLB  1   2   2
M  SAL   2  6  21  22  23  24  25  26
M  SBL   2  1  16
M  SMT   2 ^Ph
M  STY  1   3 SUP
M  SLB  1   3   3
M  SAL   3  6  27  28  29  30  31  32
M  SBL   3  1  18
M  SMT   3 ^Ph
M  END
$$$$
