# Supplementary material
Source: MDPI journal article supplement (https://www.mdpi.com/search?q=molbank-2023-M1547)
Supplement: s002 [file molbank-2023-M1547-s002.mol]

KingDraw KingDraw.mol
KingDraw2D

 32 36  0  0  0  0  0  0  0  0999 V2000
    5.0221   -1.7690    0.0000 C   0  0  0  0  0  0  0  0  0  0  0  0
    5.0221   -2.2770    0.0000 C   0  0  0  0  0  0  0  0  0  0  0  0
    5.5052   -2.4339    0.0000 N   0  0  0  0  0  0  0  0  0  0  0  0
    5.8038   -2.0230    0.0000 C   0  0  0  0  0  0  0  0  0  0  0  0
    5.5052   -1.6120    0.0000 C   0  0  0  0  0  0  0  0  0  0  0  0
    6.3118   -2.0230    0.0000 C   0  0  0  0  0  0  0  0  0  0  0  0
    6.6104   -2.4339    0.0000 N   0  0  0  0  0  0  0  0  0  0  0  0
    7.0935   -2.2770    0.0000 C   0  0  0  0  0  0  0  0  0  0  0  0
    7.0935   -1.7690    0.0000 C   0  0  0  0  0  0  0  0  0  0  0  0
    6.6104   -1.6120    0.0000 C   0  0  0  0  0  0  0  0  0  0  0  0
    7.5045   -1.4704    0.0000 N   0  0  0  0  0  0  0  0  0  0  0  0
    7.5045   -2.5756    0.0000 C   0  0  0  0  0  0  0  0  0  0  0  0
    7.9686   -2.3689    0.0000 O   0  0  0  0  0  0  0  0  0  0  0  0
    6.4534   -2.9171    0.0000 C   0  0  0  0  0  0  0  0  0  0  0  0
    4.5821   -2.5310    0.0000 C   0  0  0  0  0  0  0  0  0  0  0  0
    4.1422   -2.2770    0.0000 C   0  0  0  0  0  0  0  0  0  0  0  0
    4.1422   -1.7690    0.0000 C   0  0  0  0  0  0  0  0  0  0  0  0
    4.5821   -1.5150    0.0000 C   0  0  0  0  0  0  0  0  0  0  0  0
    6.4534   -1.1288    0.0000 C   0  0  0  0  0  0  0  0  0  0  0  0
    6.4534   -1.1288    0.0000 N   0  0  0  0  0  0  0  0  0  0  0  0
    7.4514   -3.0808    0.0000 C   0  0  0  0  0  0  0  0  0  0  0  0
    7.4514   -3.0808    0.0000 C   0  0  0  0  0  0  0  0  0  0  0  0
    7.4514   -3.0808    0.0000 C   0  0  0  0  0  0  0  0  0  0  0  0
    7.4514   -3.0808    0.0000 C   0  0  0  0  0  0  0  0  0  0  0  0
    7.4514   -3.0808    0.0000 C   0  0  0  0  0  0  0  0  0  0  0  0
    7.4514   -3.0808    0.0000 C   0  0  0  0  0  0  0  0  0  0  0  0
    6.7933   -3.2946    0.0000 C   0  0  0  0  0  0  0  0  0  0  0  0
    6.7933   -3.2946    0.0000 C   0  0  0  0  0  0  0  0  0  0  0  0
    6.7933   -3.2946    0.0000 C   0  0  0  0  0  0  0  0  0  0  0  0
    6.7933   -3.2946    0.0000 C   0  0  0  0  0  0  0  0  0  0  0  0
    6.7933   -3.2946    0.0000 C   0  0  0  0  0  0  0  0  0  0  0  0
    6.7933   -3.2946    0.0000 C   0  0  0  0  0  0  0  0  0  0  0  0
  1  2  2  0
  2  3  1  0
  3  4  1  0
  4  5  2  0
  5  1  1  0
  4  6  1  0
  6  7  1  0
  7  8  1  0
  8  9  2  0
  9 10  1  0
 10  6  2  0
 10 19  1  0
  9 11  1  0
  8 12  1  0
 12 13  2  0
 12 21  1  0
  7 14  1  0
 14 27  1  0
 15  2  1  0
 16 15  1  0
 17 16  1  0
 18 17  1  0
  1 18  1  0
 19 20  3  0
 25 26  2  0
 24 25  1  0
 23 24  2  0
 22 23  1  0
 21 22  2  0
 21 26  1  0
 27 28  2  0
 28 29  1  0
 29 30  2  0
 30 31  1  0
 31 32  2  0
 27 32  1  0
M  STY  1   1 SUP
M  SLB  1   1   1
M  SAL   1  2  19  20
M  SBL   1  1  12
M  SMT   1 ^CN
M  STY  1   2 SUP
M  SLB  1   2   2
M  SAL   2  6  21  22  23  24  25  26
M  SBL   2  1  16
M  SMT   2 ^Ph
M  STY  1   3 SUP
M  SLB  1   3   3
M  SAL   3  6  27  28  29  30  31  32
M  SBL   3  1  18
M  SMT   3 ^Ph
M  END
